# Supplementary material
Source: publisher figshare collection journal article supplement (https://diabetesjournals.figshare.com/ndownloader/files/25521929)

## Supplementary data

**Supplementary Figure S1: (A-C)** Box and whisker plots showing bodyweights of  $Lepr^{+/+}$  (WT/KO) and  $Lepr^{db/db}$  (WT/KO) mice at age of 8, 16 and 24 weeks respectively. Numbers of animals investigated are  $n \geq 8$ . Values are expressed as mean and min to max. \*\*\*\* $p < 0.0001$ , ns=not significant.

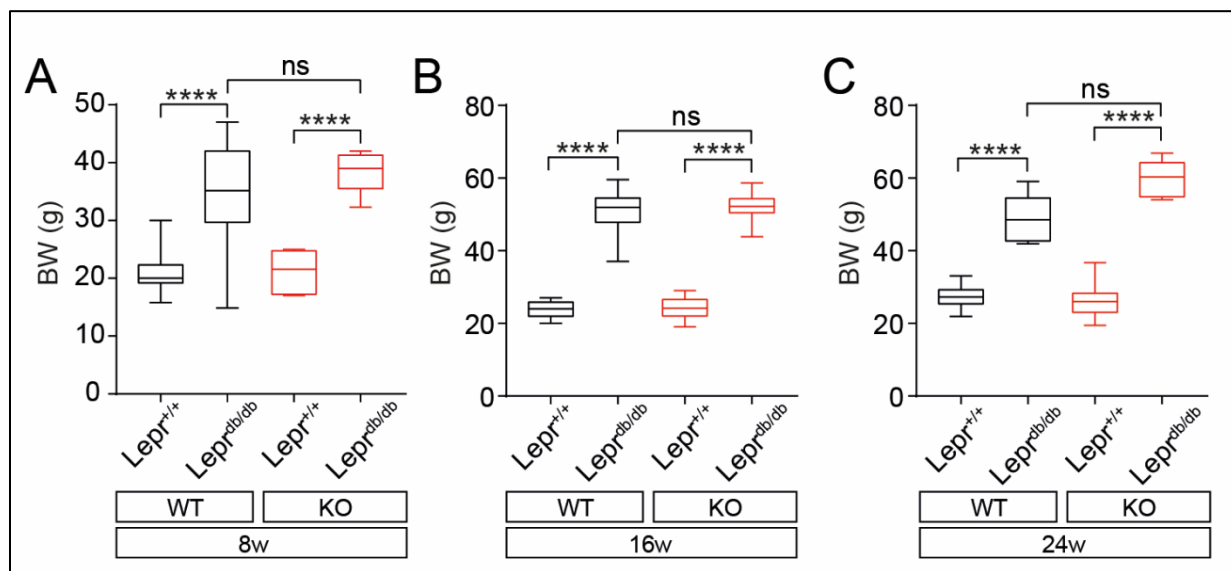

**Supplementary Figure S2:** Levels of sorbitol in skeletal muscle are equal in  $Lepr^{+/+}$  and  $Lepr^{db/db}$  conditions in WT and KO animals. Numbers of investigated animals are indicated as dots. All values are expressed as mean and SD.

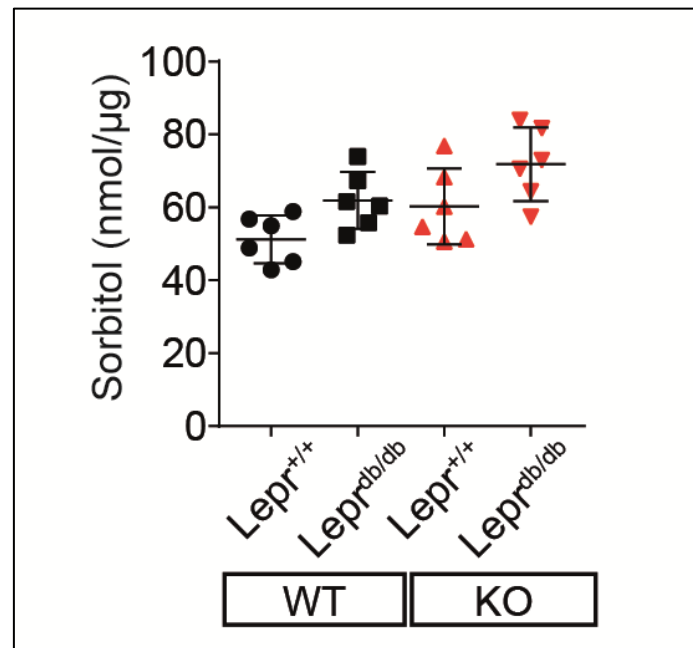

**Supplementary Figure S3: (A) Glycogen and (B) Sorbitol content in liver tissue of indicated mice. Numbers of investigated animals are indicated as dots. All values are expressed as mean and SD. \*p <0.05.**

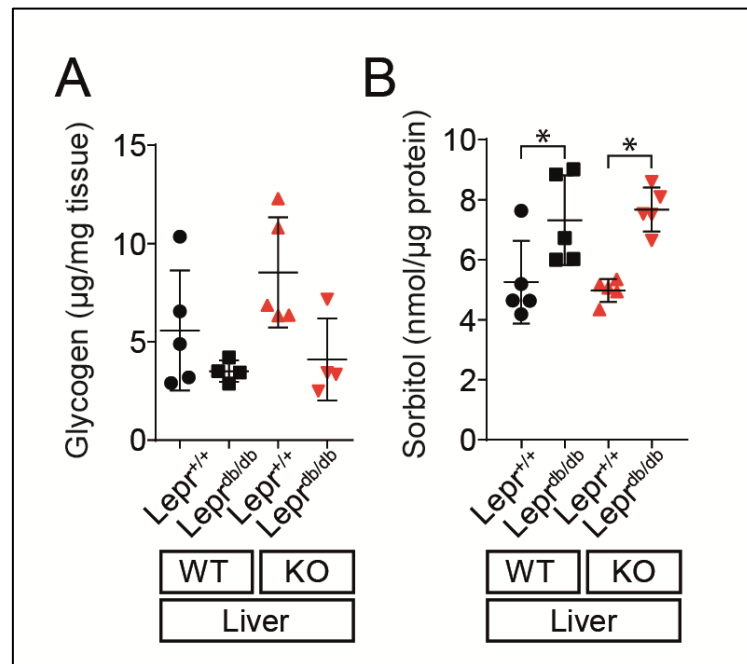

**Supplementary Figure S4: (A)** Immunoblot showing phosphorylated and total p-38 MAPK levels in livers of indicated mice,  $\beta$ -tubulin was used as loading control. **(B)** Graph showing reduced phosphorylation of p-38 MAPK in  $Lepr^{db/db}/KO$  animals. mRNA expression of *Pck-1* **(C)** and *G6pc* **(D)** is reduced in  $Lepr^{db/db}/KO$  compared to  $Lepr^{db/db}/WT$  mice. **(E)** mRNA expression of CaMKII- $\alpha$ , - $\beta$ , - $\gamma$  and - $\delta$  isoforms in liver. Numbers of animals investigated are indicated as dots. All values are expressed as mean and SD. \* $p < 0.05$ , \*\* $p < 0.01$ , \*\*\*\* $p < 0.0001$ , ns=not significant, n.d.=not detectable.

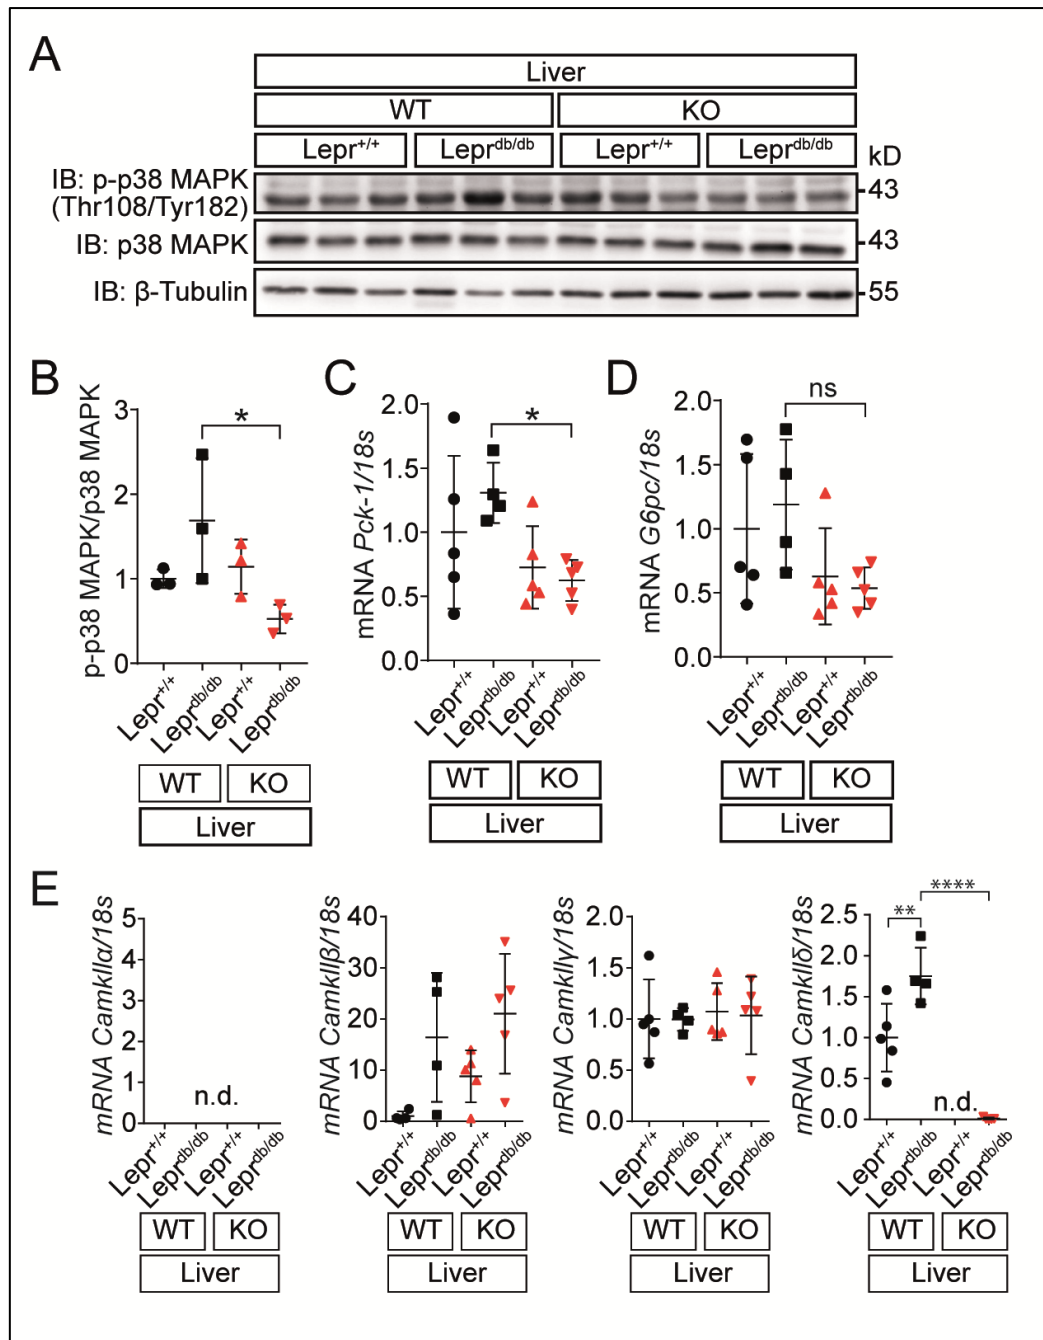

**Supplementary Figure S5: (A/B)** mRNA expression of renal *Sglt2* and *Sglt1* normalized to 18s mRNA respectively. **(C)** Urinary glucose concentrations of indicated mice normalized to creatinine. Numbers of animals investigated are indicated as dots. All values are expressed as mean and SD. \*p <0.05, \*\*p<0.01, ns=not significant.

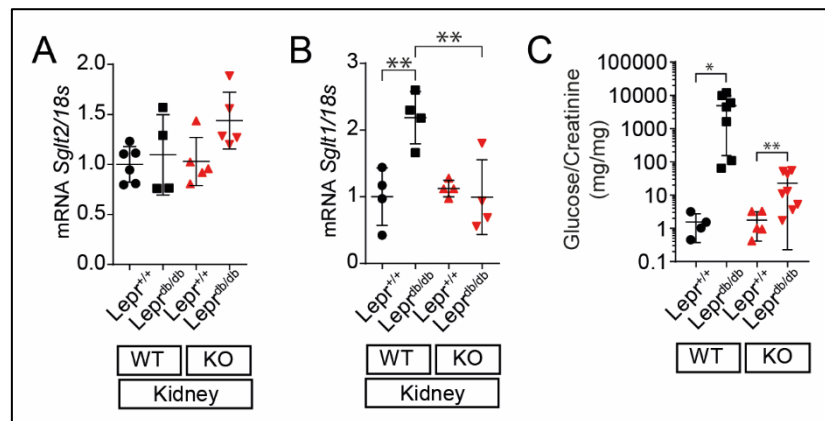

**Supplementary Figure S6: (A/B)** Kidney weight and relative glomerulum size of 8- and **(C/D)** 16 week old mice showing glomerular hypertrophy in both  $Lepr^{db/db}$  (WT and KO) groups. Numbers of animals investigated are indicated as dots or  $n \geq 8$  in box and whisker plots. Values are expressed as mean and SD in scatter plots and as mean and min to max in box and whisker plots. \* $p < 0.05$ , \*\* $p < 0.01$ , \*\*\*\* $p < 0.0001$ , ns=not significant.

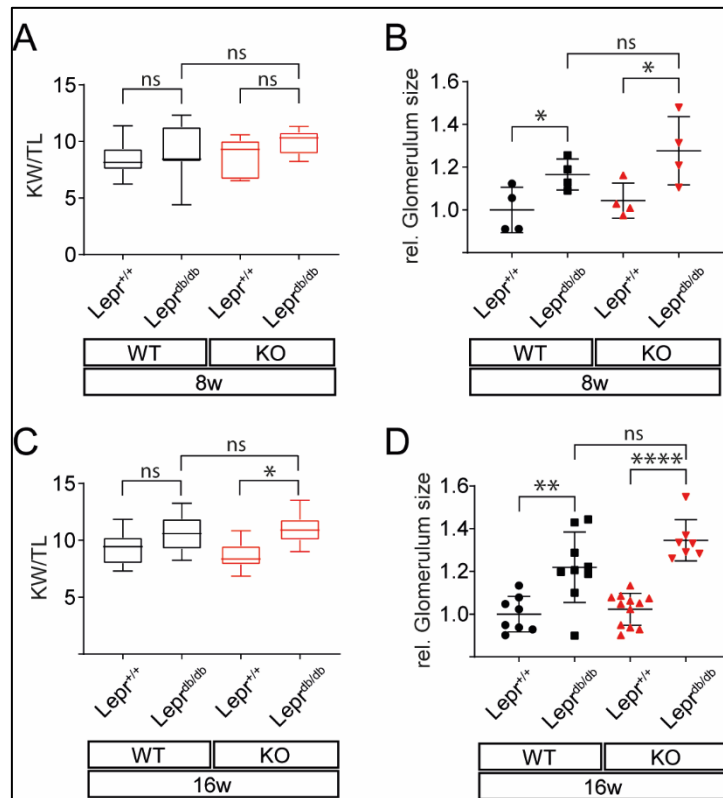

**Supplementary Figure S7: (A)** mRNA expression of *CaMKII- $\alpha$* , *- $\beta$* , *- $\gamma$*  and *- $\delta$*  isoforms in kidney and **(B)** in retina. Numbers of animals investigated are indicated as dots. All values are expressed as mean and SD. \* $p < 0.05$ , \*\* $p < 0.01$ , \*\*\*\* $p < 0.0001$ , n.d.=not detectable.

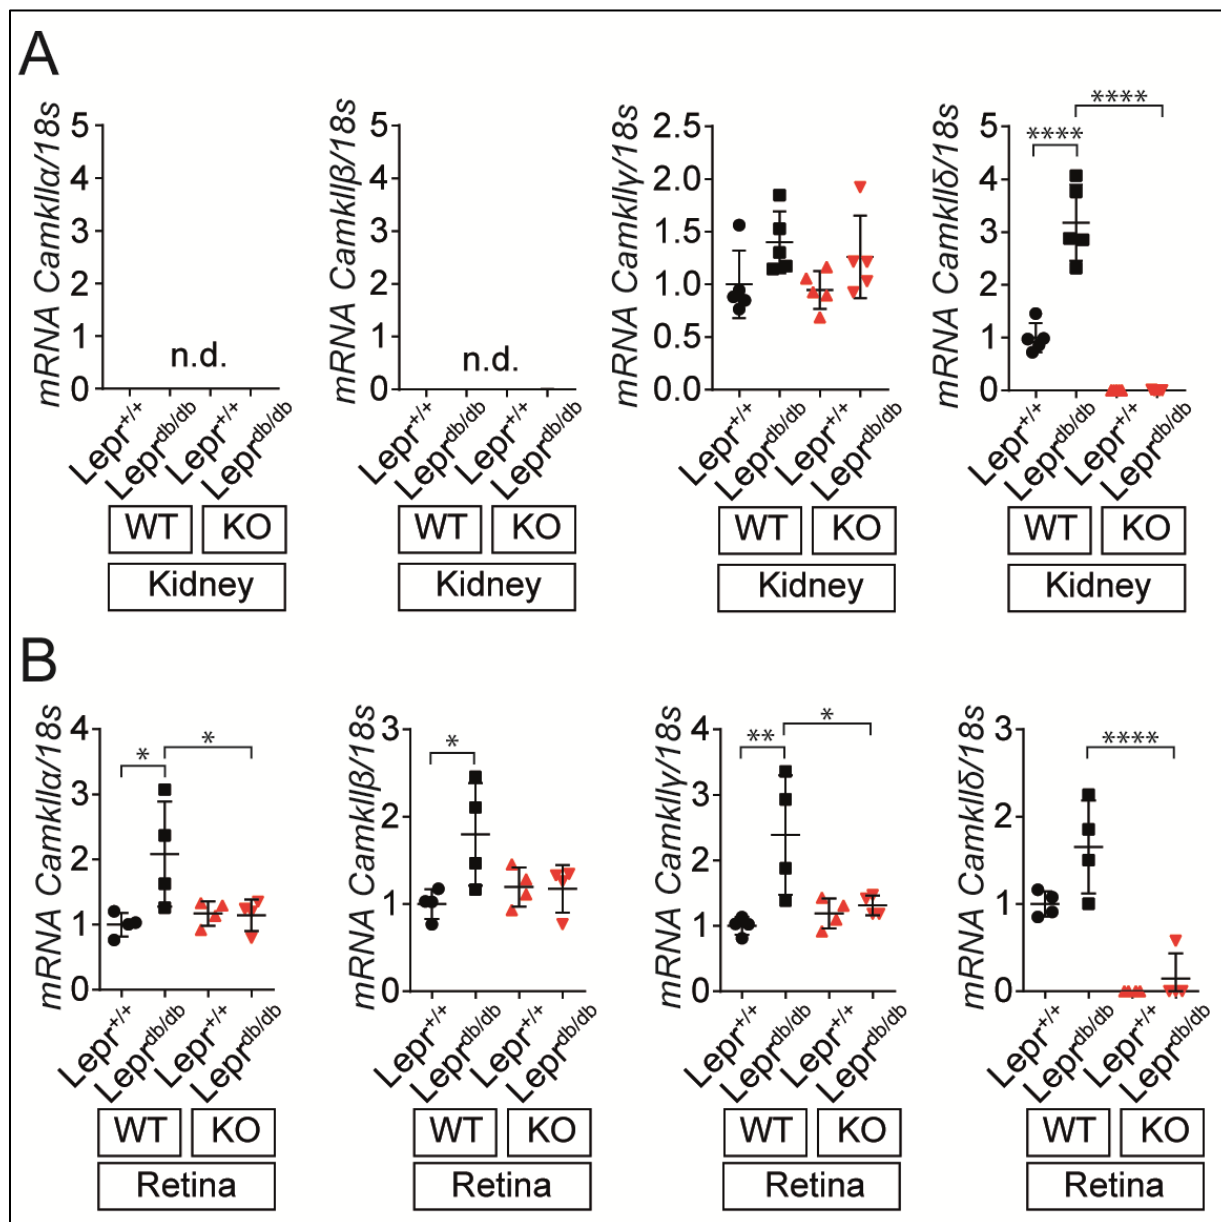

**Supplementary Figure S8: (A/C)** Immunoblot demonstrating successful siRNA mediated knockdown of CaMKII in M1 and MES13 cells. **(B/D)** Glycolysis stress test performed with a seahorse analyser in M1 and MES13 cells.

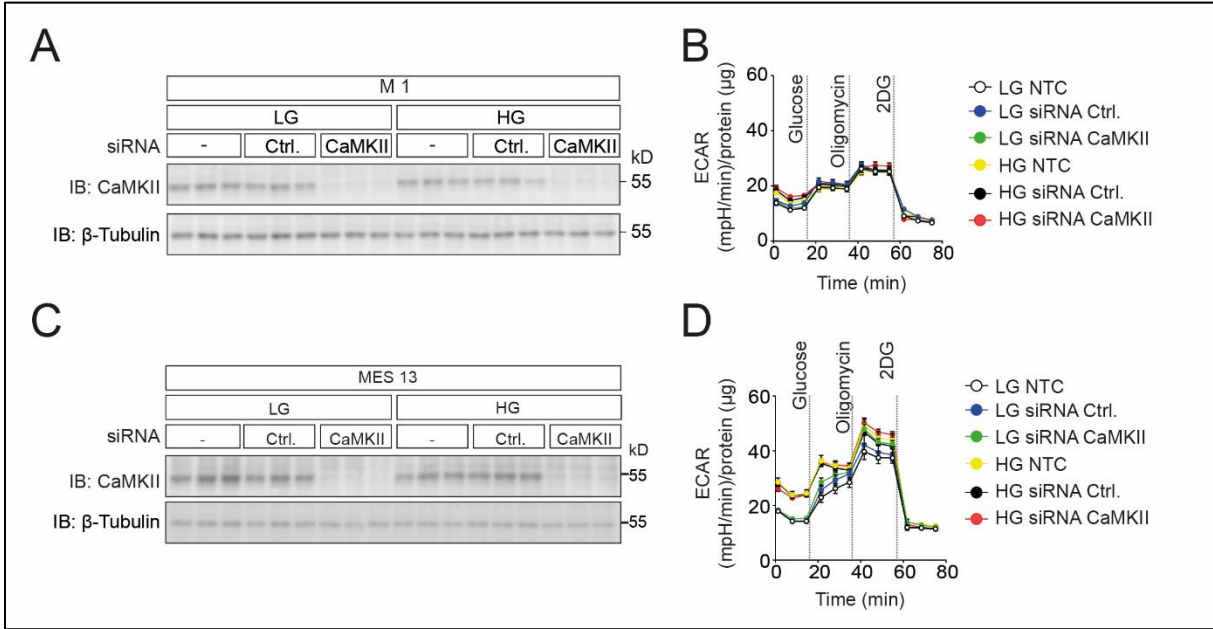





**Supplementary Figure S10: (A)** Heatmap of differentially regulated genes involved in lipid metabolism in retina and **(B)** kidney. **(C)** Heatmap of lipid classes represents only minor changes of lipidome in serum, kidney and retina between the indicated groups. (D) PCA plots of lipidome changes in serum, kidney and retina  $Lepr^{+/+}/WT$  vs.  $Lepr^{db/db}/WT$  (left diagrams) and  $Lepr^{+/+}/KO$  vs.  $Lepr^{db/db}/KO$ . **(E)** Bar graph showing levels of Phosphatidyl ethanolamine (PE) and Cholesterol (Chol) in Retina. Numbers of animals investigated are  $n \geq 3$  in A and B and  $n \geq 4$  in C-E.

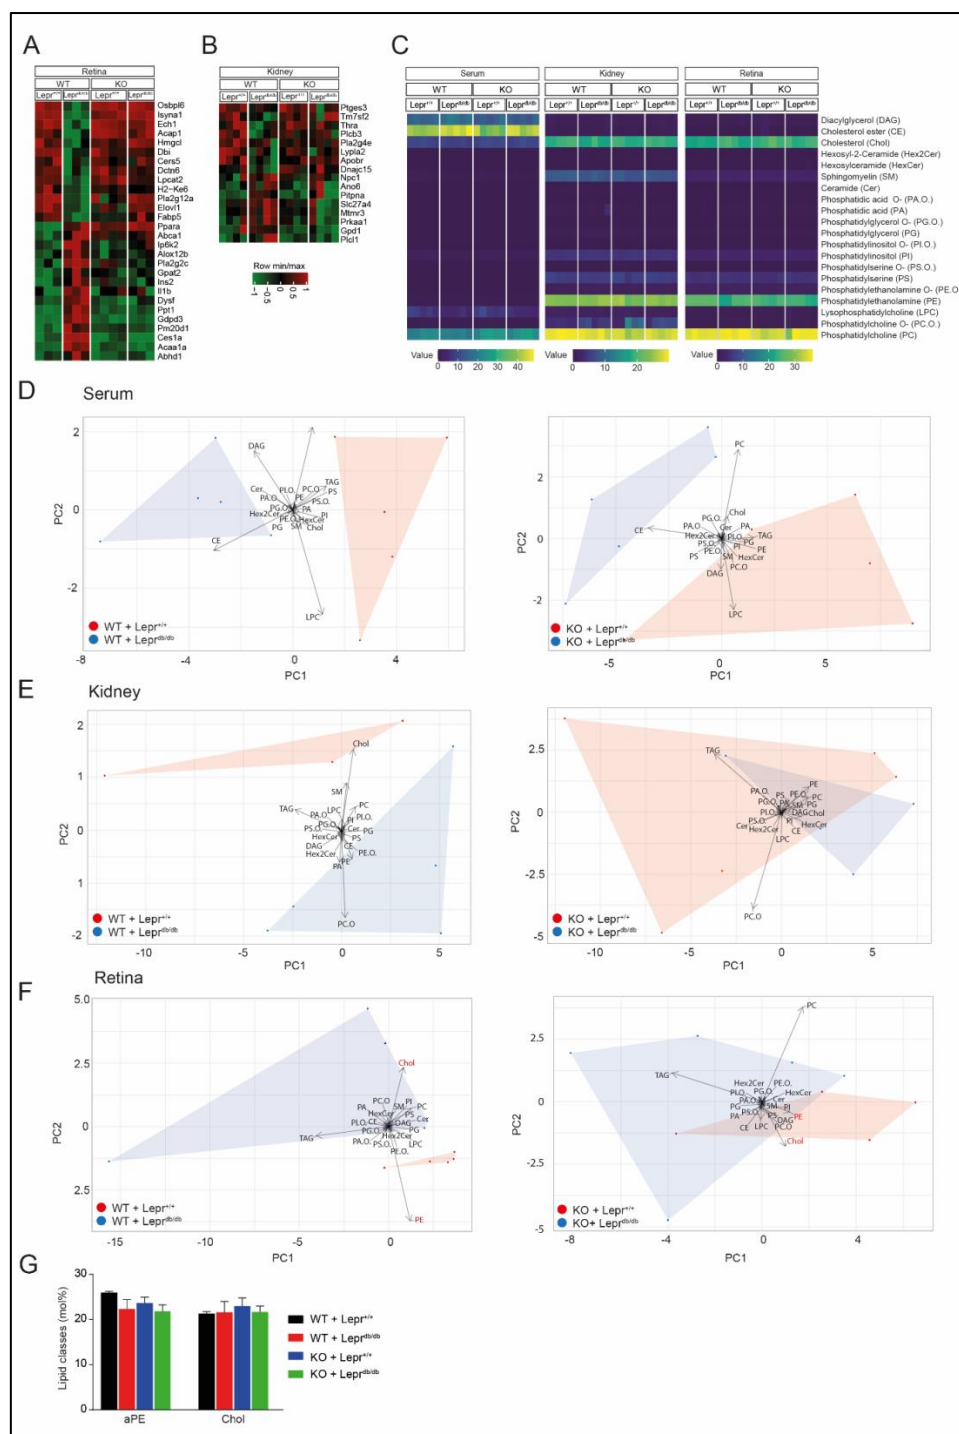

Supplement: Supplementary file 1 [file 25521929]
